# Supplementary material
Source: publisher figshare collection journal article supplement (https://frontiersin.figshare.com/ndownloader/files/27526109)
Supplement: Supplementary file 1 [file 27526109]

## APPENDIX

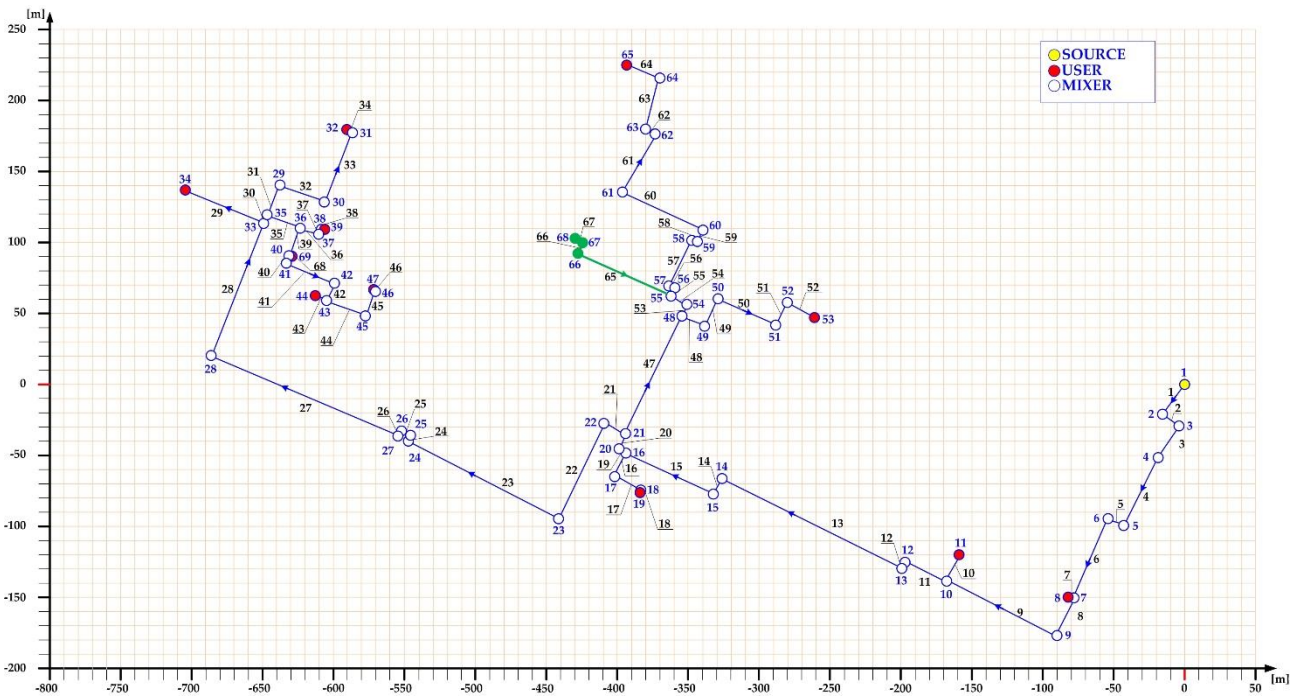

**Fig. A1.** Network setting in Case 3 (the green pipes are closed in this configuration) and in Case 4 (in green color the reverse flow pipes with respect to the design case).

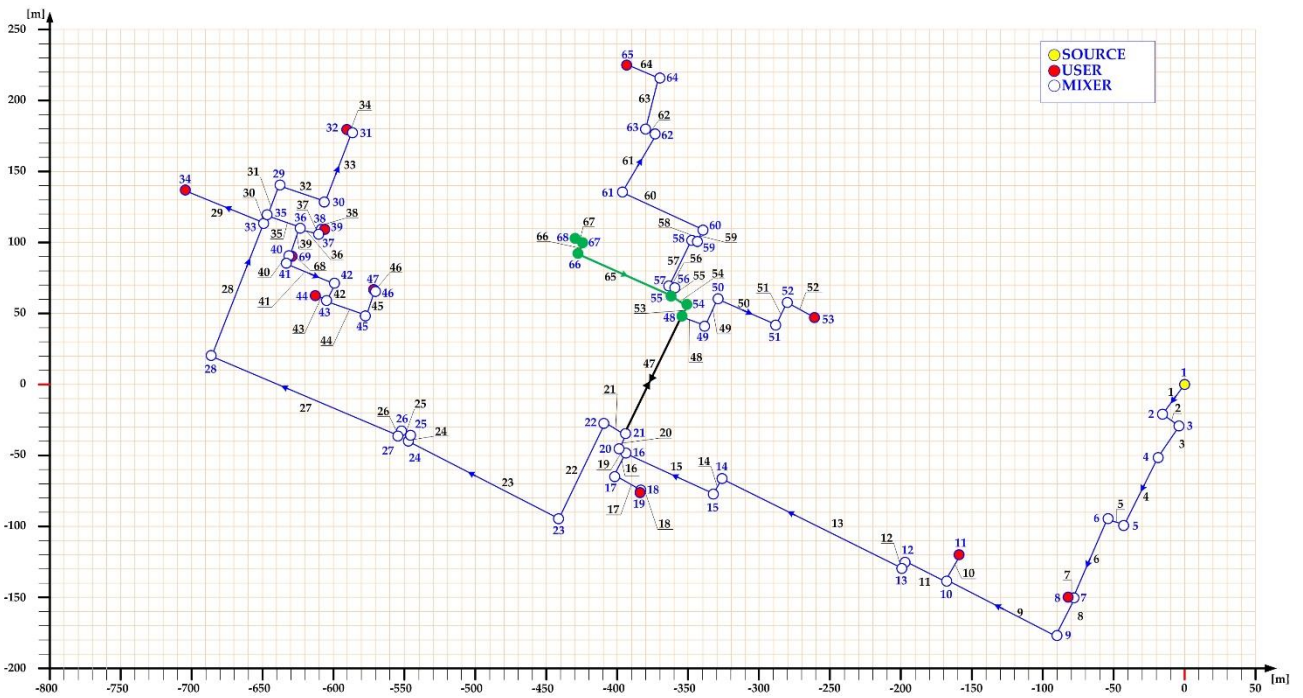

**Fig. A2.** Network setting in Case 5 (in green color the reverse flow pipes with respect to the design case, in black color the closed pipes).

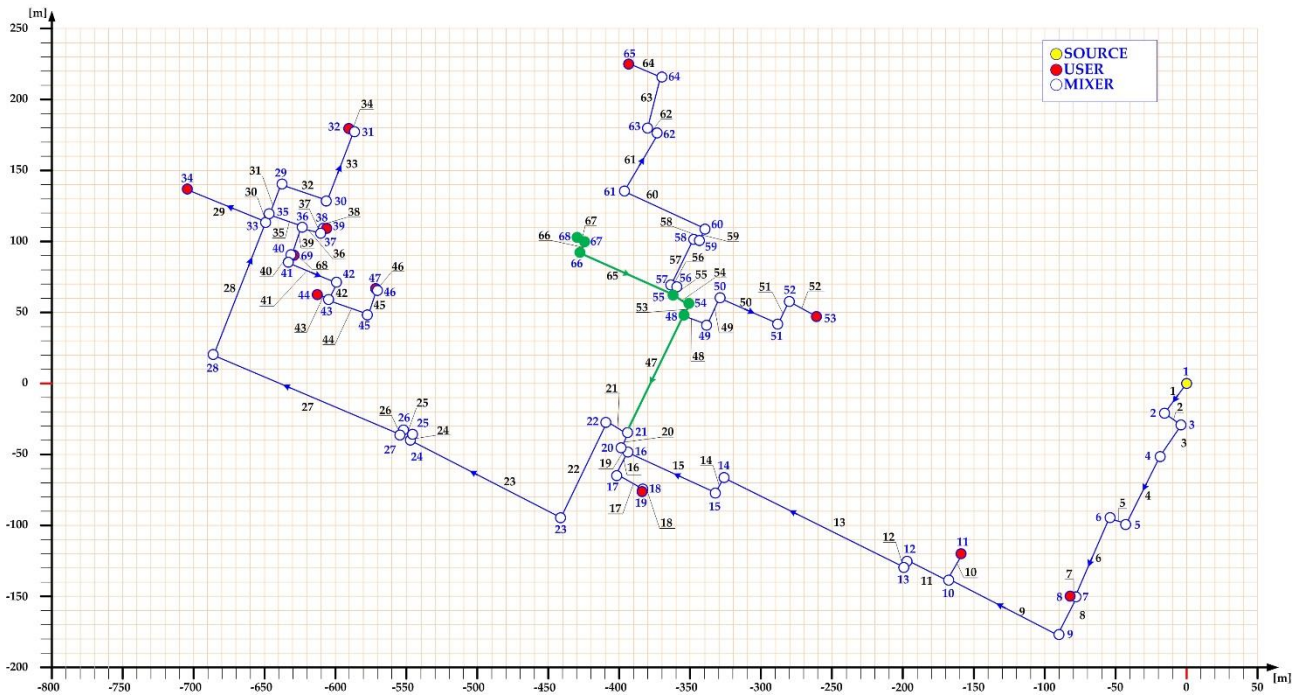

**Fig. A3.** Network setting in Case 6 and in Case 7 (in green color the reverse flow pipes with respect to the design case).

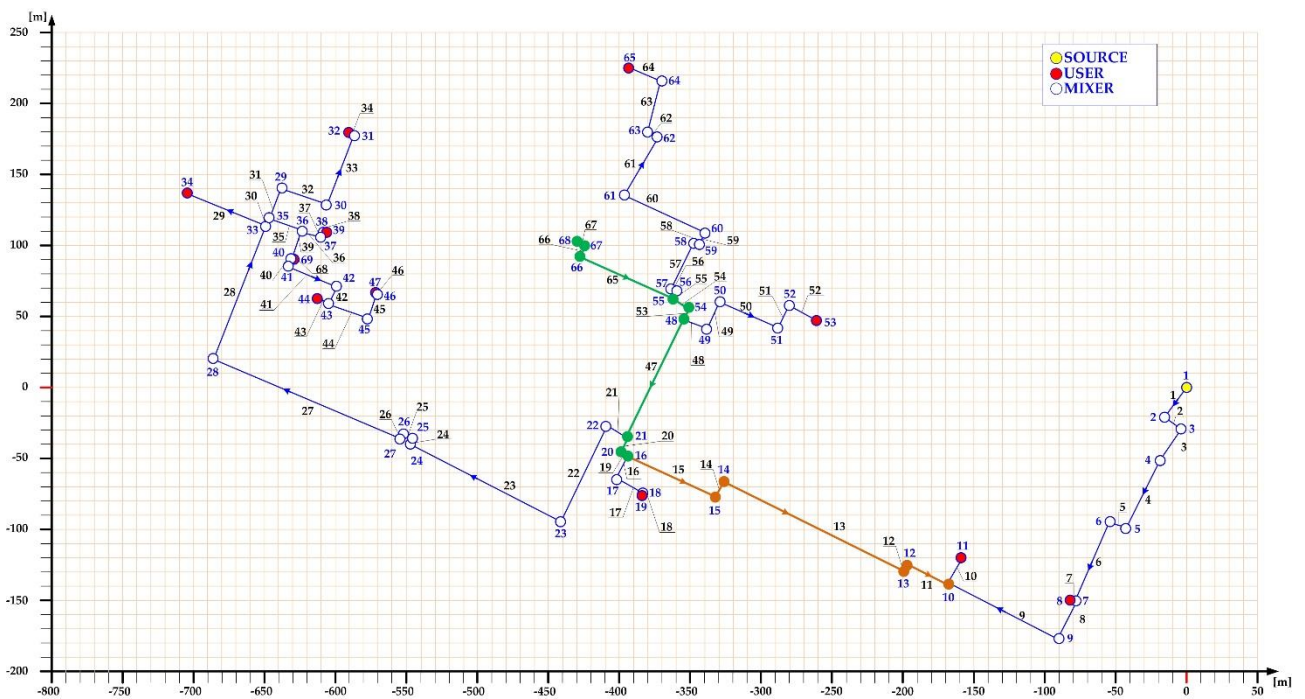

**Fig. A4.** Network setting in Case 8 (in green color the reverse flow with respect to the design case pipes for  $P_{th68} = 10273 \text{ kW}$ , in orange and green color the reverse flow with respect to the design case pipes for  $P_{th68} = 11375 \text{ kW}$ ).

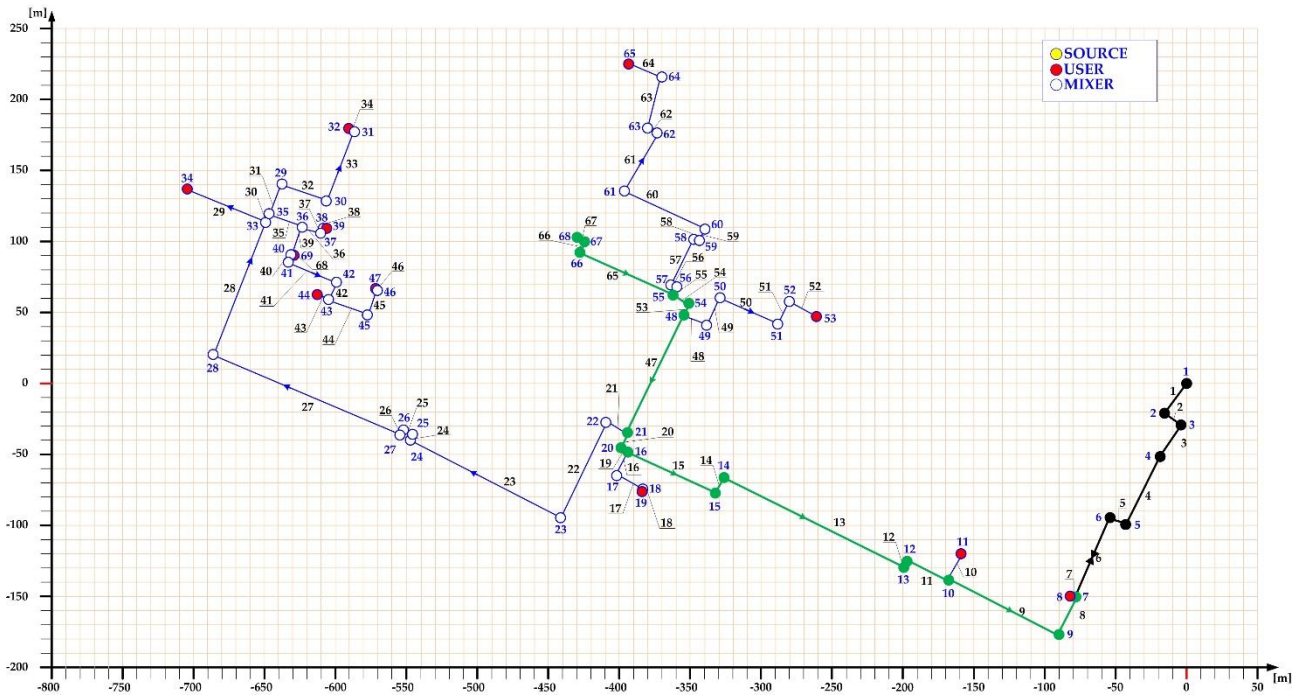

**Fig. A5.** Network setting in Case 9 (in green color the reverse flow pipes with respect to the design case, in in black color the closed pipes).
